# Supplementary material for: Mutational spectrum and risk stratification of intermediate-risk acute myeloid leukemia patients based on next-generation sequencing
Source: PubMed Central journal article supplement (PMC5077997; doi:10.18632/oncotarget.7028), 2016-01-27
Supplement: oncotarget-07-32065-s001.pdf [file oncotarget-07-32065-s001.pdf]

# Mutational spectrum and risk stratification of intermediate-risk acute myeloid leukemia patients based on next-generation sequencing

## SUPPLEMENTARY METHODS

### Illumina library construction and sequencing

Indexed Illumina NGS libraries were prepared from 95 IR-AML bone marrow samples, 26 newly diagnosed AML with matched control samples, and 32 peripheral blood leukocyte genomic DNA samples. For these cases, 1 µg DNA was sheared before library construction with a Bioruptor UCD-600 (NGS) (Diagenod) instrument using the recommended settings for 200-bp fragments. NGS libraries were constructed following the Illumina standard DNA sample preparation protocol using KAPA HiFi DNA Polymerase (a DNA polymerase possessing strong 3'→5' exonuclease activity and displaying the lowest published error rate). Library purity and concentration was assessed with a Qubit2.0 Fluorometer (Invitrogen). Fragment length was measured on a 2100 Bioanalyzer using the DNA 1000 Kit (Agilent).

NimbleGen SeqCap EZ Choice was used according to the manufacturer's protocol with modifications. Between 10-14 indexed Illumina libraries were included in one capture hybridization. After hybrid selection, captured DNA fragments were amplified with 13 cycles of PCR using 1× KAPA HiFi Hot Start Ready Mix and 0.4 µM Illumina backbone oligonucleotides in 50-µL reactions. The reactions were then pooled and quantified with QPCR. Multiplexed libraries were sequenced using 100-bp paired-end runs on an Illumina HiSeq 2500.

### Mutation detection pipeline

For 95 IR-AML, the SCARF file was converted to FASTQ format by Casava software version 1.8 (Illumina). Raw sequence reads were filtered with an indigenous program. Reads with more than 5% N bases, or of which at least 50% bases had  $Q \leq 5$ , were eliminated. The remaining reads were aligned, using a Burrows-Wheeler alignment (BWA-0.7.5a) tool, to human genomic reference sequences (HG19, NCBI built 37) with certain parameters (aln -o 1 -e 63 -i 15 -L -l 31 -k 1 -t 6, sample -a 200) [1]. To decrease PCR duplication bias, the resulting Bam files were processed with Samtools. Only unique reads were delivered for analyses. For identification of SNP and indel, GATK with recommended parameters was performed [2], Pindel (0.2.4) was performed to identify the FLT3 internal tandem duplications (ITD) [3]. All mutations were annotated by ANNOVAR software [4] using the following resources:

1. All annotated transcripts in RefSeq Gene;
  2. Known constitutional polymorphisms as reported in known human variation databases, such as 1000 genomes release XX, Exome Aggregation Consortium (ExAC) release XX and dbSNP XX [5];
  3. Known somatic variation in myeloid and other malignancies as reported in COSMIC v70 [6];
- To identify high-confidence somatic variants in all IR-AML samples in the absence of matched control samples, the following criteria were used:
1. Removal of all variants within intronic, UTR and intergenic regions, and retention of only nonsynonymous, frameshift and stopgain mutations in exonic regions;
  2. Removal of known polymorphisms present in either 1000 genome or ExAC databases at a population frequency  $> 0.005$ ;
  3. Removal of all variants represent in at least 1 of 32 healthy individuals or saliva samples in 26 newly diagnosed AML patients;
  4. Removal of all variants with one of the following features in GATK results: read depth less than 30, Phred-scaled  $p$ -value using Fisher's exact test to detect strand bias more than 60, variant confidence/quality by depth below 2, mapping quality lower than 40, Alt/Ref read mapping qualities not more than -12.5 and Alt/Ref read position bias not over -8;
  5. Removal of all variants with Allele Frequency  $>0.42$  and  $<0.58$  if the variant was not annotated as somatic in COSMIC database. For variants marked MOSMIC whit Frequency  $> 0.47$  and  $<0.53$  were Removed.

### Remove harmless mutations

Because we lacked matched normal samples, somatic mutations could not be selected by comparing tumor and matched normal sample. Thus, a series of steps were used to remove germline mutations and harmless mutations. Mutations were removed unless they satisfied all of the following conditions:

1. The mutation depth was larger than 30;
2. The mutation occurred in an exonic region;
3. The mutation function was not "synonymous SNV";
4. The annotation from ClinVar was not "benign" or the mutation did not appear in a dbSNP135 or 1000 Genomes Project (2012 Feb) database.

### Evaluation of sensitivity and specificity of cell line dilution data

To evaluate the GATK pipeline in mixed sample, cell dilution data were used. Assuming that 0 and 100% solutions of Kasumi-1 cells were accurate, we hypothesized that at each dilution of these cells we could calculate true SNPs and false-positive SNPs. To test sensitivity limits, we evaluated another method using VarScan. The reads number that support the mutation was considered to be the only requirement for mutation. We set a cutoff at six reads. Supplementary Figure S4 shows that at 3% 81% homozygous and 52% heterozygous mutations were correctly detected in 800x coverage data.

### REFERENCES

1. Li H, Durbin R. Fast and accurate short read alignment with Burrows–Wheeler transform. *Bioinformatics*, 2009, 25:1754–1760.
2. McKenna A, Hanna M, Banks E, et al. The Genome Analysis Toolkit: a MapReduce framework for analyzing next-generation DNA sequencing data. *Genome research*, 2010, 20:1297–1303.
3. Ye K, Schulz M H, Long Q, et al. Pindel: a pattern growth approach to detect break points of large deletions and medium sized insertions from paired-end short reads. *Bioinformatics*, 2009, 25:2865–2871.
4. Wang K, Li M, Hakonarson H. ANNOVAR: functional annotation of genetic variants from high-throughput sequencing data. *Nucleic acids research*, 2010, 38:e164–e164.
5. Joobor R. The 1000 Genomes Project: deep genomic sequencing waiting for deep psychiatric phenotyping. *J Psychiatry Neurosci*. 2011; 36:147–149.
6. Forbes SA, Bindal N, Bamford S, et al. COSMIC: mining complete cancer genomes in the Catalogue of Somatic Mutations in Cancer. *Nucleic Acids Res*. 2011; 39:945–950.

SUPPLEMENTARY FIGURES AND TABLES

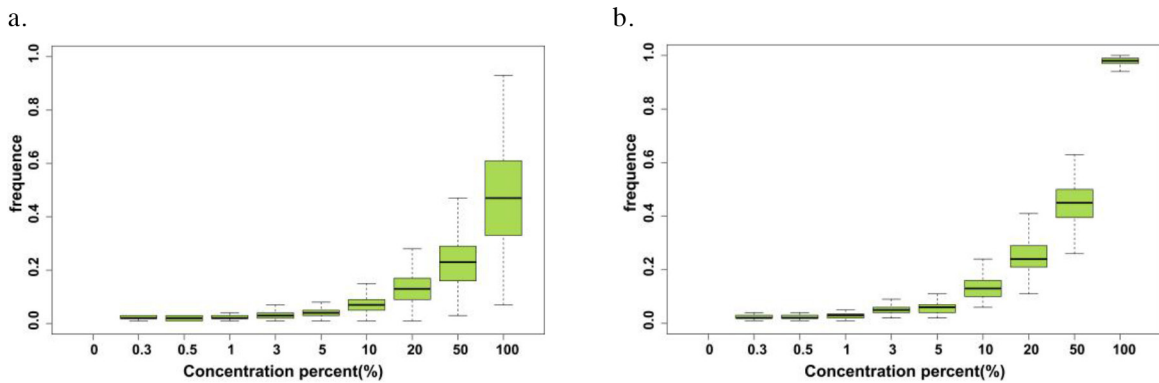

**Supplementary Figure S1: Frequency of unique SNP in Kasumi-1 at each level.** The distribution of variant allele frequencies of unique SNPs in Kasumi-1 cells at each level. **a.** Heterozygous mutations were extracted to evaluate the relation between variant allele frequency and concentration percent. **b.** Homozygous mutations are shown. The allele frequency of unique SNPs in Kasumi-1 cells reflects Kasumi-1 cell concentration.

- nonframeshift deletion
- nonsynonymous SNV
- ▼ frameshift insertion
- ▼ stopgain SNV
- frameshift deletion
- ▼ nonframeshift insertion

*FLT3*

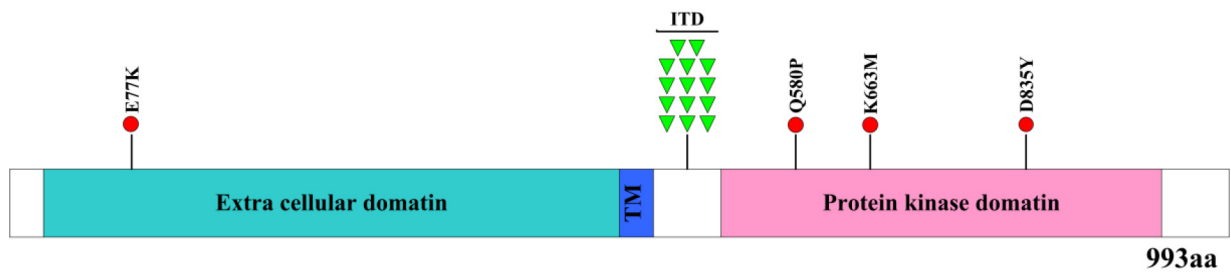

*KIT*

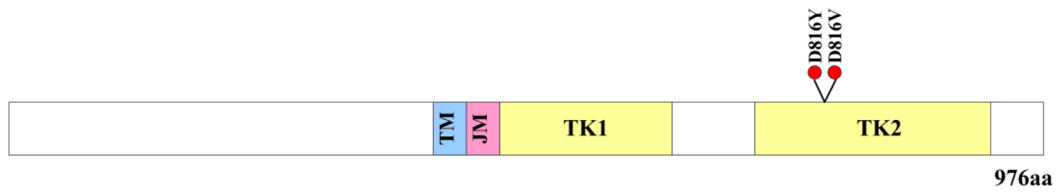

*NRAS*

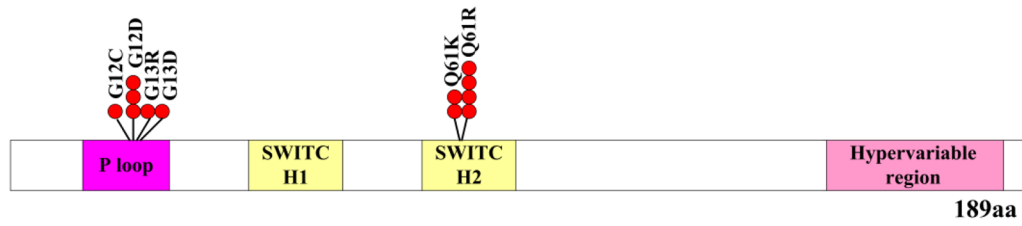

*KRAS*

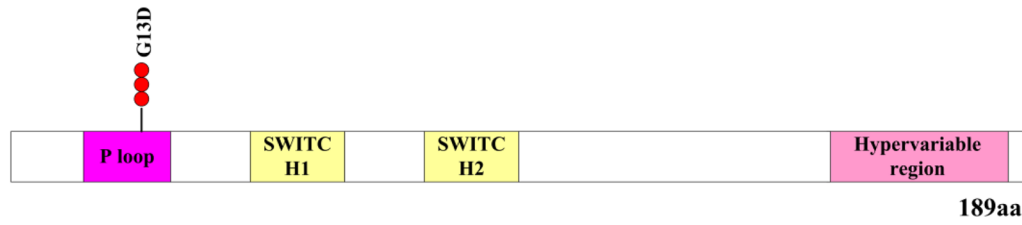

*PTPN11*

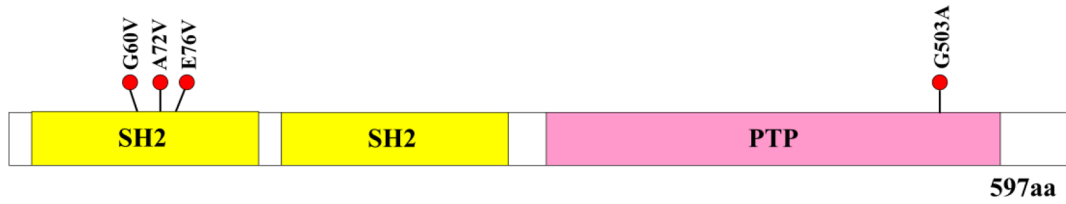

*RUNX1*

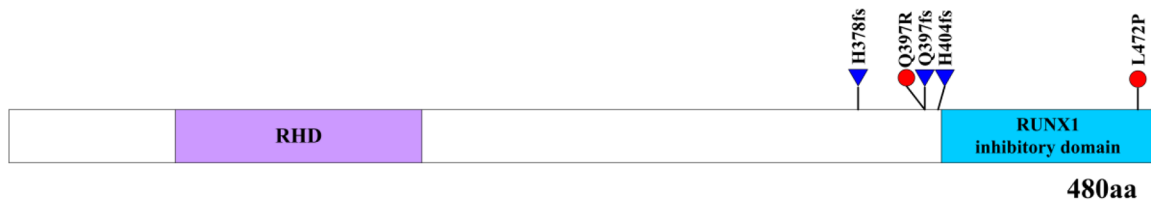

*IDH1*

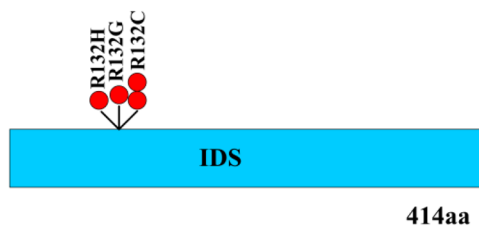

*IDH2*

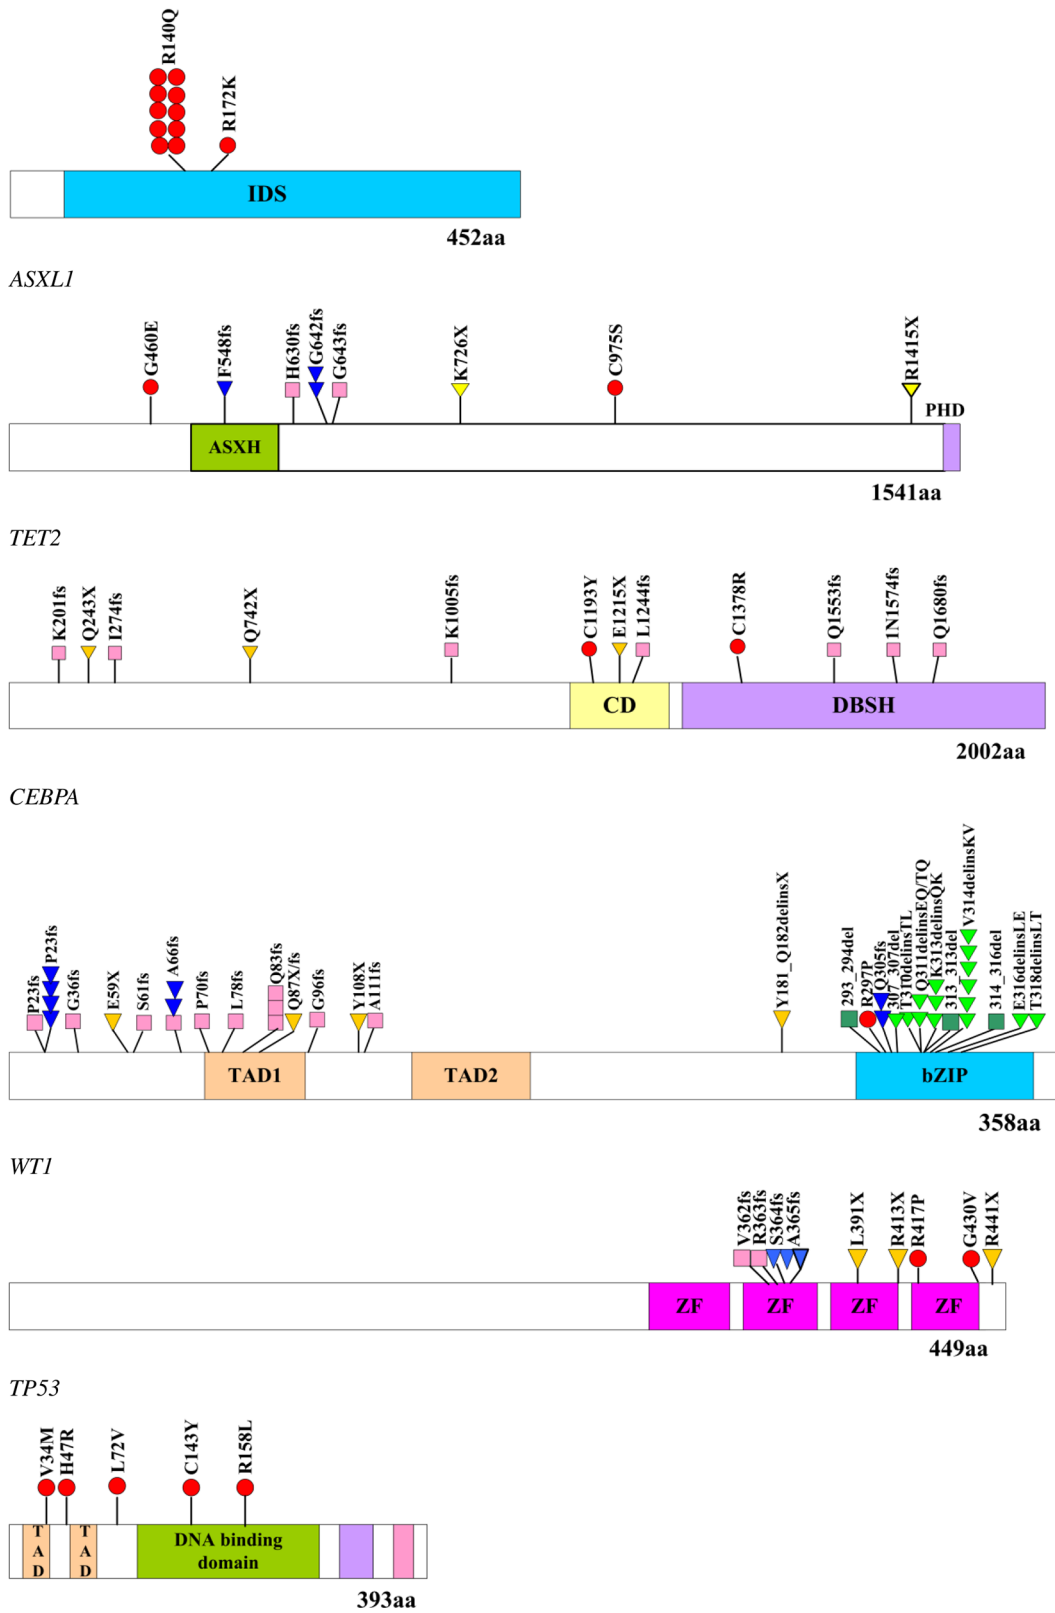

*DNMT3A*

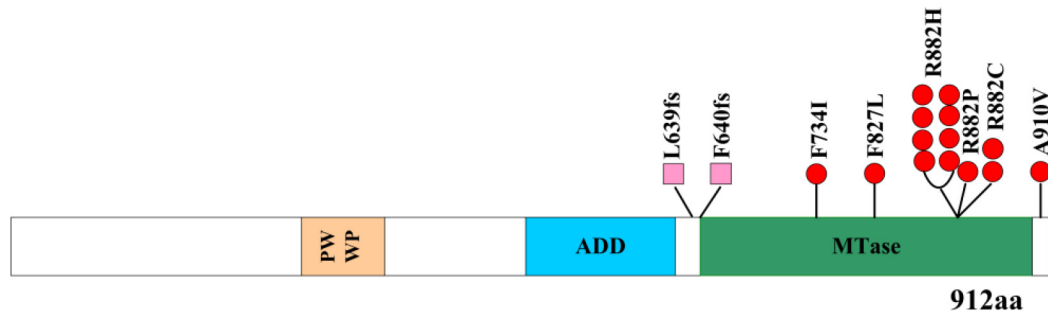

Supplementary Figure S2: Position and type of mutations identified in this study.

Significantly overlapped mutations

|                 | <i>NPM1</i>     |     |
|-----------------|-----------------|-----|
| <i>DNMT3A</i>   | wt              | mut |
| wt              | 69              | 10  |
| mut             | 6               | 10  |
| p-value         | p=0.000         |     |
|                 | <i>NPM1</i>     |     |
| <i>FLT3-ITD</i> | wt              | mut |
| wt              | 69              | 12  |
| mut             | 6               | 8   |
| p-value         | p=0.000         |     |
|                 | <i>FLT3-ITD</i> |     |
| <i>DNMT3A</i>   | wt              | mut |
| wt              | 71              | 8   |
| mut             | 10              | 6   |
| p-value         | p=0.005         |     |
|                 | <i>WT1</i>      |     |
| <i>NRAS</i>     | wt              | mut |
| wt              | 77              | 6   |
| mut             | 8               | 4   |
| p-value         | p=0.024         |     |

Mutually exclusive mutations

|             | <i>IDH1/2</i> |     |
|-------------|---------------|-----|
| <i>TET2</i> | wt            | mut |
| wt          | 71            | 15  |
| mut         | 9             | 0   |
| p-value     | p=0.000       |     |
|             | <i>WT1</i>    |     |
| <i>TET2</i> | wt            | mut |
| wt          | 76            | 10  |
| mut         | 9             | 0   |
| p-value     | p=0.000       |     |
|             | <i>CEBPA</i>  |     |
| <i>NPM1</i> | wt            | mut |
| wt          | 45            | 27  |
| mut         | 20            | 0   |
| p-value     | p=0.000       |     |
|             | <i>STAG2</i>  |     |
| <i>SMC3</i> | wt            | mut |
| wt          | 88            | 5   |
| mut         | 2             | 0   |
| p-value     | p=0.000       |     |

Supplementary Figure S3: Cooperative and exclusive patterns of overlapping mutations. Significantly overlapped mutations were observed among *FLT3-ITD* mutations and *NPM1*, *DNMT3A* mutations; *WT1* and *NRAS* mutations. In contrast, mutually exclusive mutations were observed between *IDH1/2* and *TET2* mutations; *WT1* and *TET2* mutations; *CEBPA* and *NPM1* mutations; and among the Cohesion complex mutations.

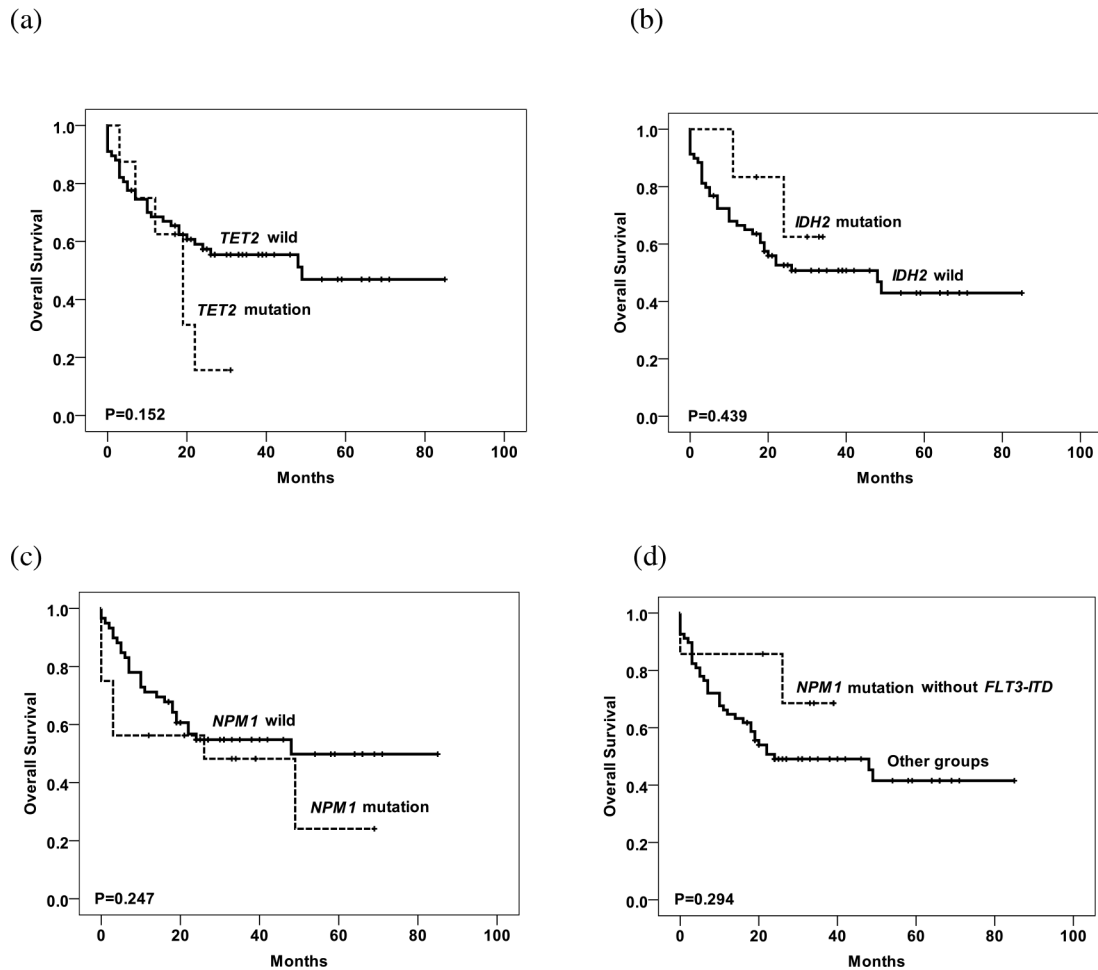

**Supplementary Figure S4: Kaplan-Meier curves of overall survival for single-gene mutations.** Kaplan-Meier curves according to the mutations are shown. P value was estimated by the log-rank test. The mutated number of *TET2*, *IDH2* and *NPM1* is 9, 11 and 20 respectively. Of which 8, 6 and 16 patients were used for survival analysis, respectively. **a.** Kaplan-Meier curves of overall survival for *TET2* mutations. **b.** Kaplan-Meier curves of overall survival for *IDH2* mutations. **c.** Kaplan-Meier curves of overall survival for *NPM1* mutations. **d.** Kaplan-Meier curves of overall survival for *NPM1* mutations without *FLT3-ITD*.

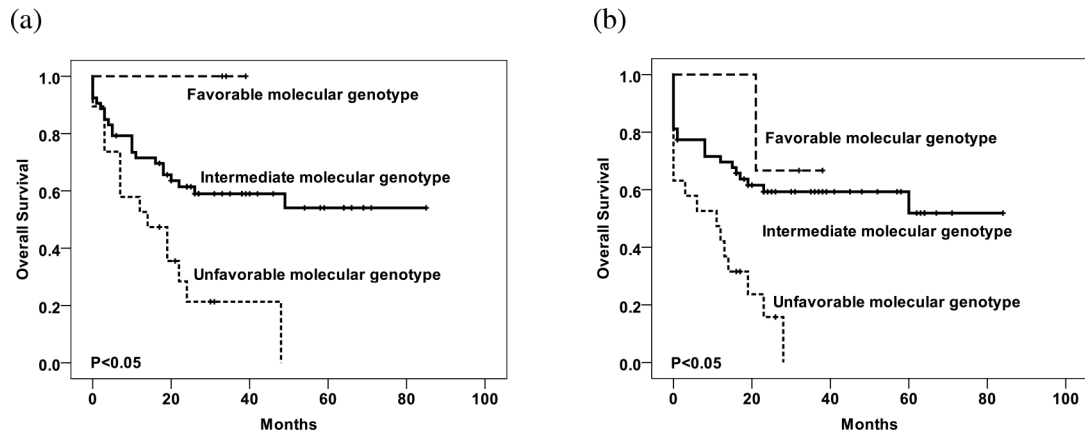

**Supplementary Figure S5: Kaplan-Meier curves of OS and DFS for comprehensive mutational analysis according to the model proposed by Patel and colleagues.** When the patients were stratified into the risk groups proposed by Patel et al., three distinct prognostic subgroups can be separated, that is, intermediate cytogenetics and favorable genotype, intermediate cytogenetics and genotype, intermediate cytogenetics and unfavorable genotype which included 5, 67 and 23 patients, respectively. Of which 3, 53 and 19 patients were used for survival analysis, respectively. **a.** Kaplan-Meier curves of OS. **b.** Kaplan-Meier curves of DFS.

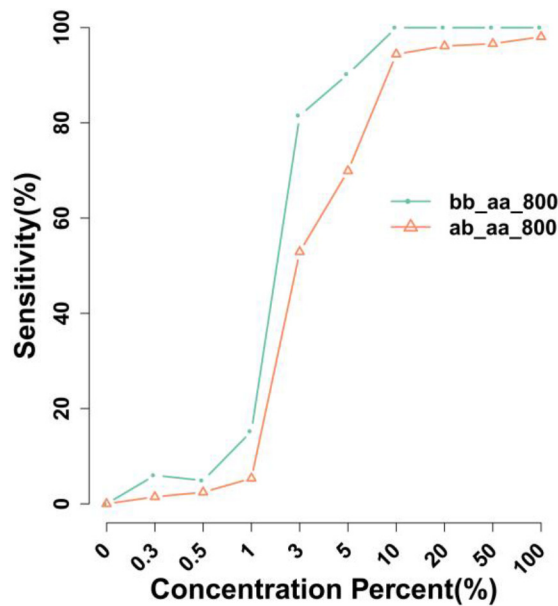

**Supplementary Figure S6: Another method to detect SNPs in diluted cells.** To measure mutations in cell line dilutions, 800x depth data was used to evaluate performance. At 3%, 81% homozygous mutations and 52% heterozygous mutations can be detected correctly in 800x coverage data.



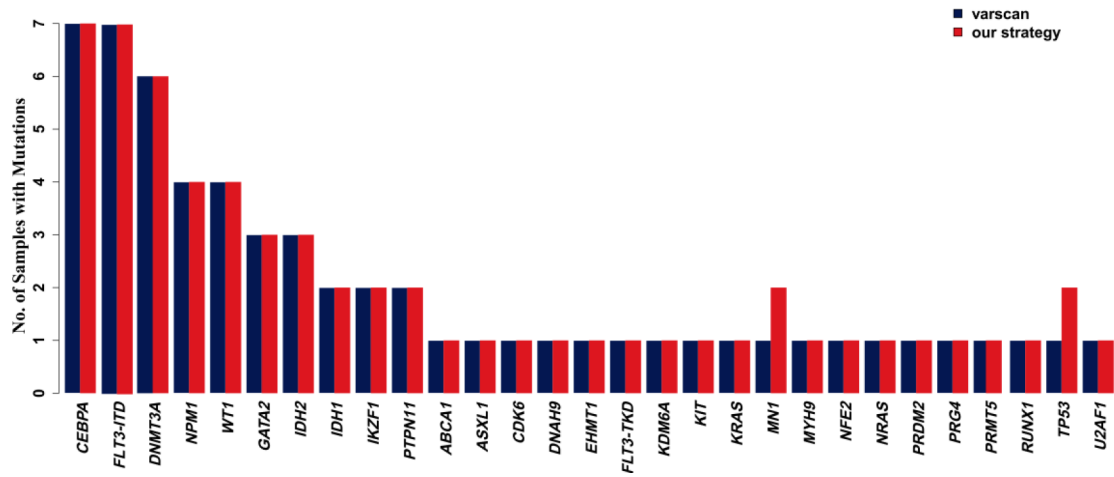

Supplementary Figure S7: Comparison of somatic mutations identified by our strategy and Varscan in 26 newly diagnosed AML patients.

**Supplementary Table S1: 410 gene list in this panel.**

See Supplementary File 1

**Supplementary Table S2: 101 genes identified in this study.**

See Supplementary File 2

**Supplementary Table S3: Validation of gene mutations by sanger sequencing.**

See Supplementary File 3

**Supplementary Table S4: The clinical features of single mutational analysis.**

See Supplementary File 4

**Supplementary Table S5: Clinical features of comprehensive analysis of multiple mutations**

| Variable                                                                                   | WBC count at diagnosis | P value |
|--------------------------------------------------------------------------------------------|------------------------|---------|
| <i>NPM1</i> <sup>mut</sup> / <i>FLT3-ITD</i> <sup>mut</sup> / <i>DNMT3A</i> <sup>mut</sup> | 132.39(70-332.77)      | 0.047   |
| <i>NPM1</i> <sup>mut</sup> / <i>FLT3-ITD</i> <sup>neg</sup> / <i>DNMT3A</i> <sup>mut</sup> | 18.01(11.57-135.16)    |         |
| Variable                                                                                   | WBC count at diagnosis | P value |
| <i>NPM1</i> <sup>mut</sup> / <i>FLT3-ITD</i> <sup>mut</sup> / <i>DNMT3A</i> <sup>mut</sup> | 132.39(70-332.77)      | 0.047   |
| <i>NPM1</i> <sup>neg</sup> / <i>FLT3-ITD</i> <sup>neg</sup> / <i>DNMT3A</i> <sup>mut</sup> | 21.33(1.78-168.7)      |         |

*NPM1*<sup>mut</sup>/*FLT3-ITD*<sup>mut</sup>/*DNMT3A*<sup>mut</sup> AML had greater leukocyte counts than *NPM1*<sup>wt</sup>/*FLT3-ITD*<sup>neg</sup>/*DNMT3A*<sup>mut</sup> or *NPM1*<sup>mut</sup>/*FLT3-ITD*<sup>neg</sup>/*DNMT3A*<sup>mut</sup> group. Differences were using a Mann-Whitney *U*-test.

**Supplementary Table S6: The proportion of transplant patients in two groups analyzed for survival analysis**

| Gene            | Numbers and proportion of transplant patients in mutation group | Numbers and proportion of transplant patients in non-mutation group |
|-----------------|-----------------------------------------------------------------|---------------------------------------------------------------------|
| <i>ASXL1</i>    | 2/6 (33.3%)                                                     | 36/ 69 (52.1%)                                                      |
| <i>DNMT3A</i>   | 4/12 (33.3%)                                                    | 34/63 (53.9%)                                                       |
| <i>FLT3-ITD</i> | 7/14 (50.0%)                                                    | 31/61 (50.8%)                                                       |
| <i>CEBPA</i>    | 13/22 (59.0%)                                                   | 25/53 (47.2%)                                                       |
| <i>NPM1</i>     | 8/16 (50.0%)                                                    | 30/59 (50.8%)                                                       |

**Supplementary Table S7: Cell line dilution data**

| ID          | Component           |                |
|-------------|---------------------|----------------|
|             | Kasumi-1 (AML1-ETO) | K562 (BCR-ABL) |
| HC14AN00001 | 0%                  | 100%           |
| HC14AN00002 | 3%                  | 99.70%         |
| HC14AN00003 | 5%                  | 99.50%         |
| HC14AN00004 | 1%                  | 99%            |
| HC14AN00005 | 3%                  | 97%            |
| HC14AN00006 | 5%                  | 95%            |
| HC14AN00007 | 10%                 | 90%            |
| HC14AN00008 | 20%                 | 80%            |
| HC14AN00009 | 50%                 | 50%            |
| HC14AN00010 | 100%                | 0%             |

To evaluate the performance of a mutation detection method, Kasumi-1 and K56 cells were at different ration.
